# Supplementary material for: H3F3A K27M Mutation Promotes the Infiltrative Growth of High-Grade Glioma in Adults by Activating β-Catenin/USP1 Signaling
Source: MDPI journal article supplement (doi:10.3390/cancers14194836), 2022-10-03

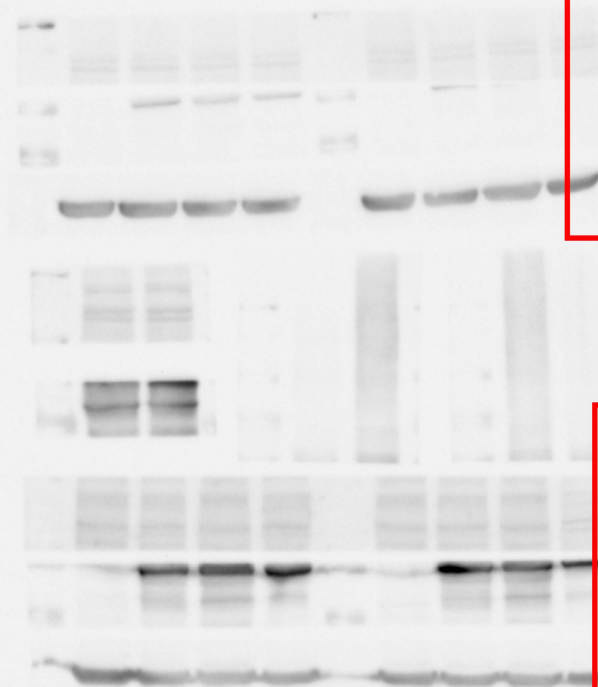

fig1A

|       | non tumor |    |    | Grade II |    |    | Grade III |    |     | Grade IV |     |     |     |     |
|-------|-----------|----|----|----------|----|----|-----------|----|-----|----------|-----|-----|-----|-----|
|       | N1        | N2 | N3 | T1       | T2 | T3 | T8        | T9 | T10 | T11      | T15 | T16 | T17 | T18 |
| 15kDa |           |    |    |          |    |    |           |    |     |          |     |     |     |     |
| 10kDa | 0         | 0  | 0  | 0        | 0  | 0  | 0         | 0  | 0   | 0        | 0   | 1   | 0   | 0.9 |

H3K27M

|       | non tumor |    |    | Grade II |    |    |    | Grade III |     |     |     | Grade IV |     |     |  |
|-------|-----------|----|----|----------|----|----|----|-----------|-----|-----|-----|----------|-----|-----|--|
|       | N4        | N5 | N6 | T4       | T5 | T6 | T7 | T12       | T13 | T14 | T19 | T20      | T21 | T22 |  |
| 15kDa |           |    |    |          |    |    |    |           |     |     |     |          |     |     |  |
| 10kDa | 0         | 0  | 0  | 0        | 0  | 0  | 0  | 0         | 1   | 0   | 0   | 0        | 0   | 0   |  |

H3K27M

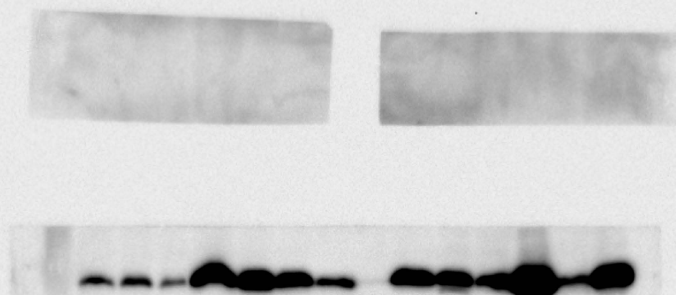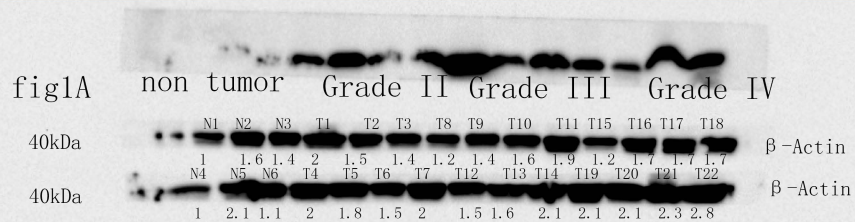

fig1C      293T   U87   LN229   U118   U251   T98G   A172

15kDa H3K27M

10kDa      0    0    0    0    0    0    0

fig1C

55kDa 293T U87 LN229 U118 U251 T98G A172

40kDa 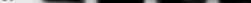 β-Actin

35kDa 1 1.5 1.7 2 1.7 1.4 1.5

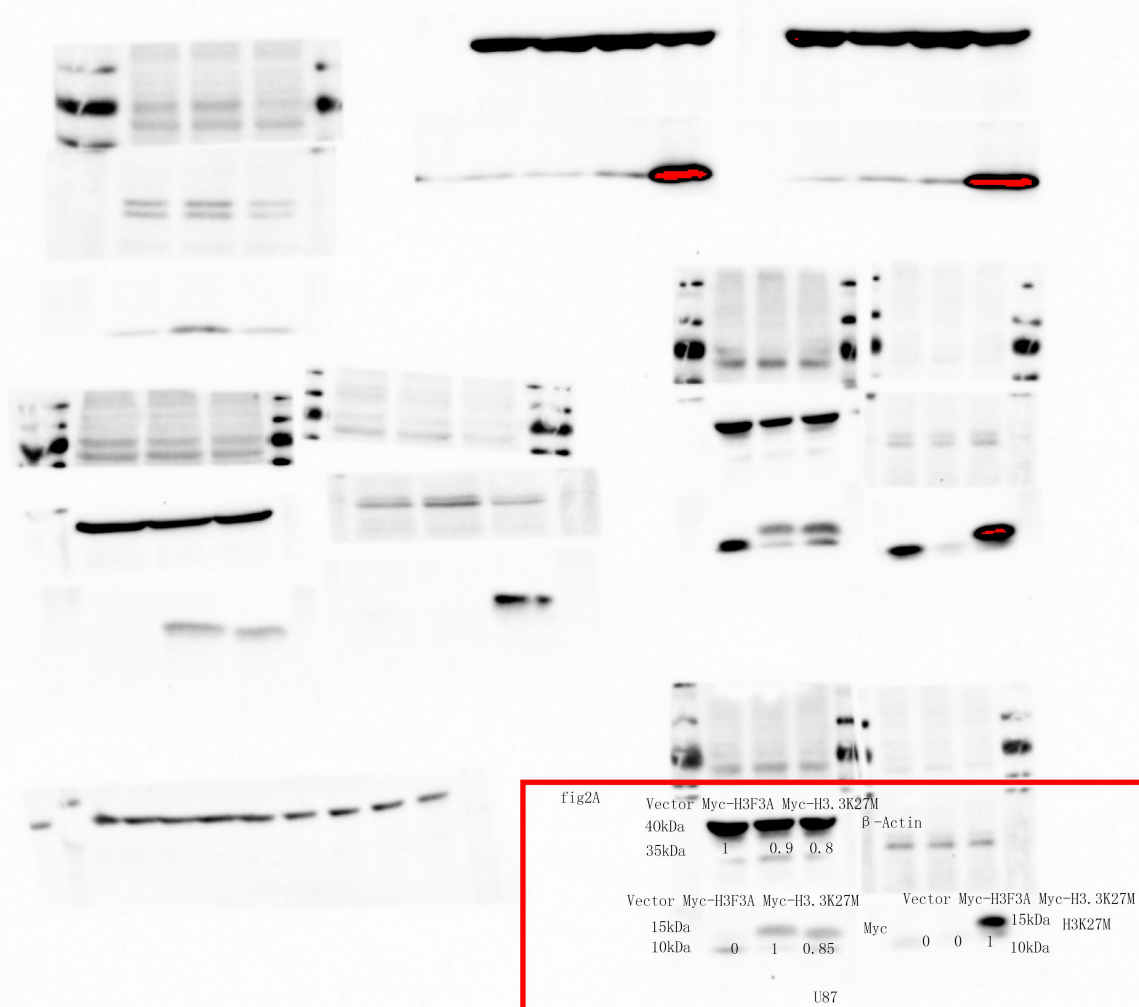



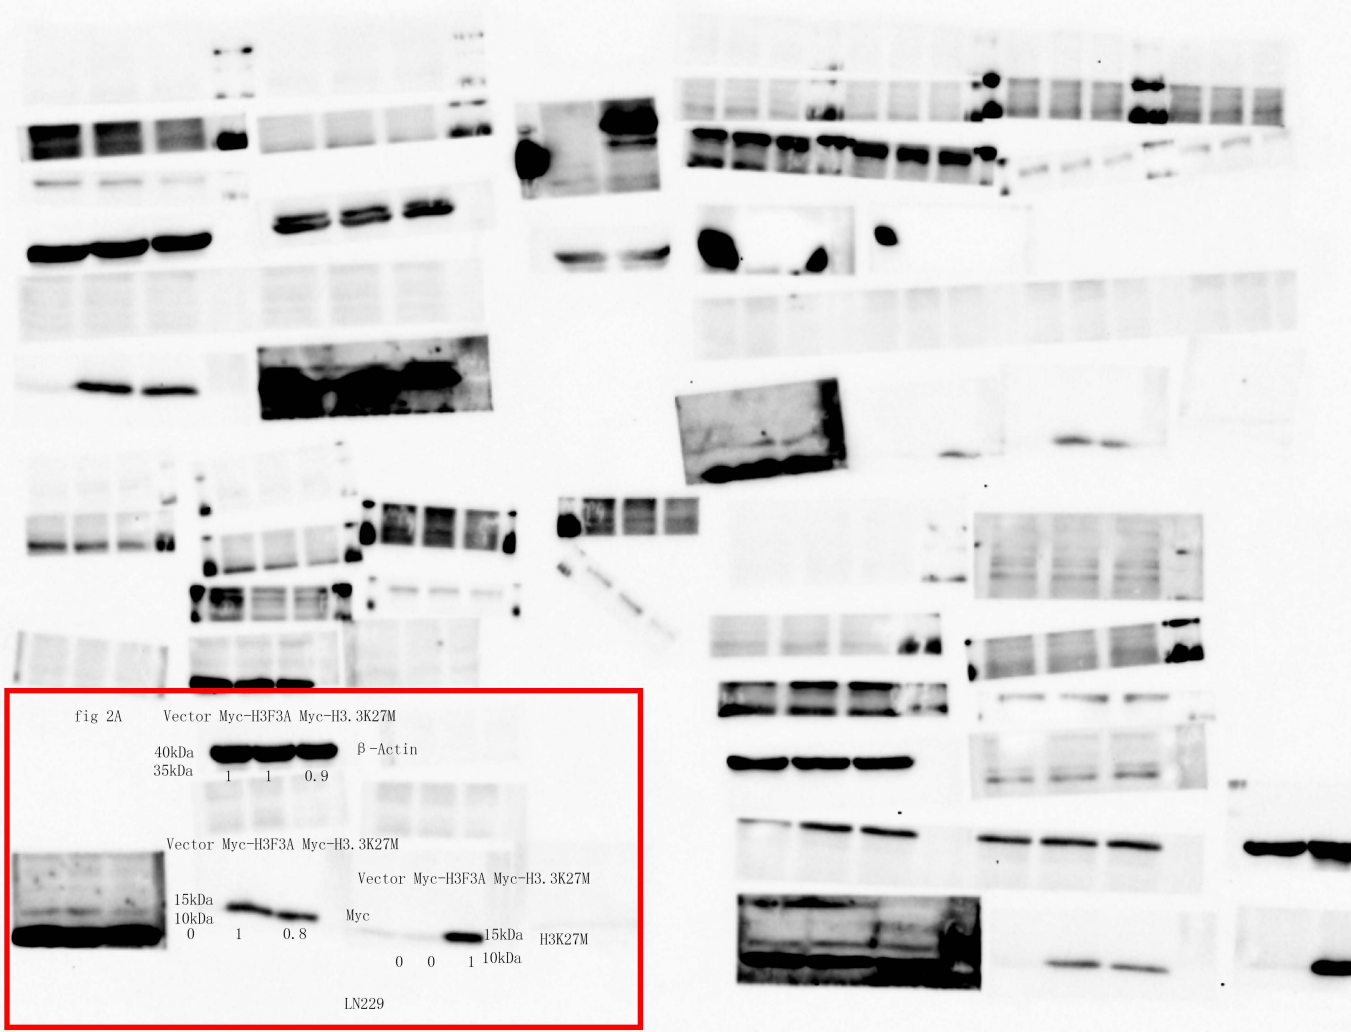

fig 2A

Vector Myc-H3F3A Myc-H3. 3K27M

40kDa  
35kDa 1 1 0.9  $\beta$ -Actin

Vector Myc-H3F3A Myc-H3. 3K27M

15kDa  
10kDa 0 1 0.8 Myc 15kDa H3K27M  
0 0 1 10kDa

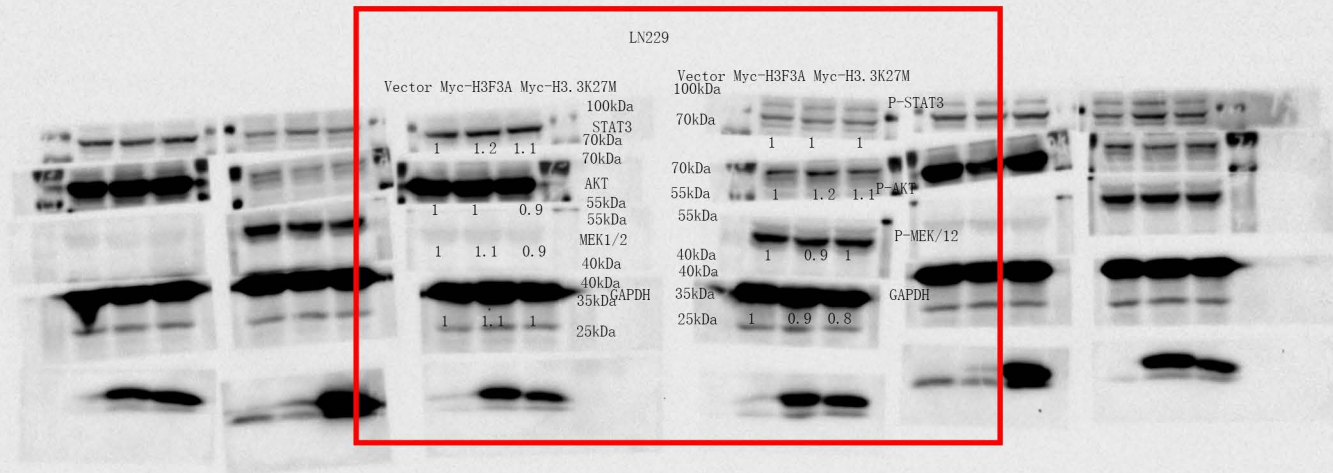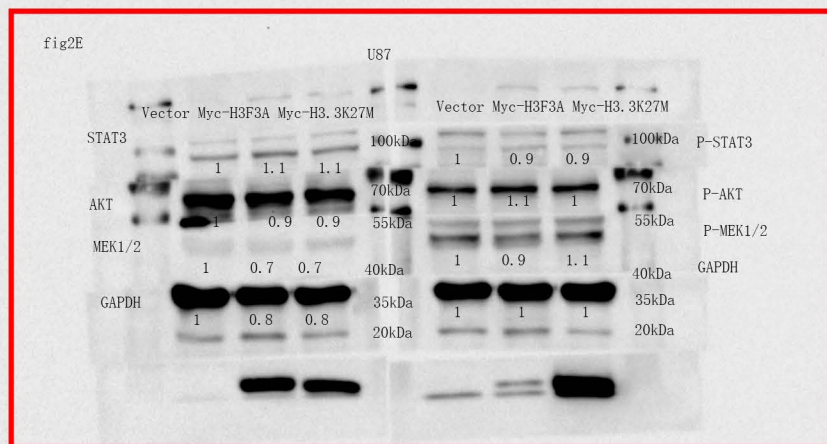

fig5A U87

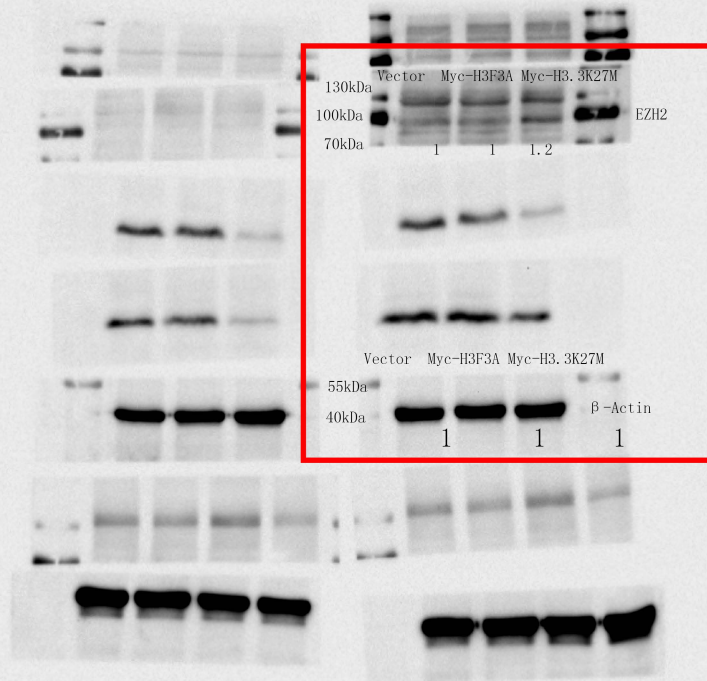



fig5D 87

fig5B 87

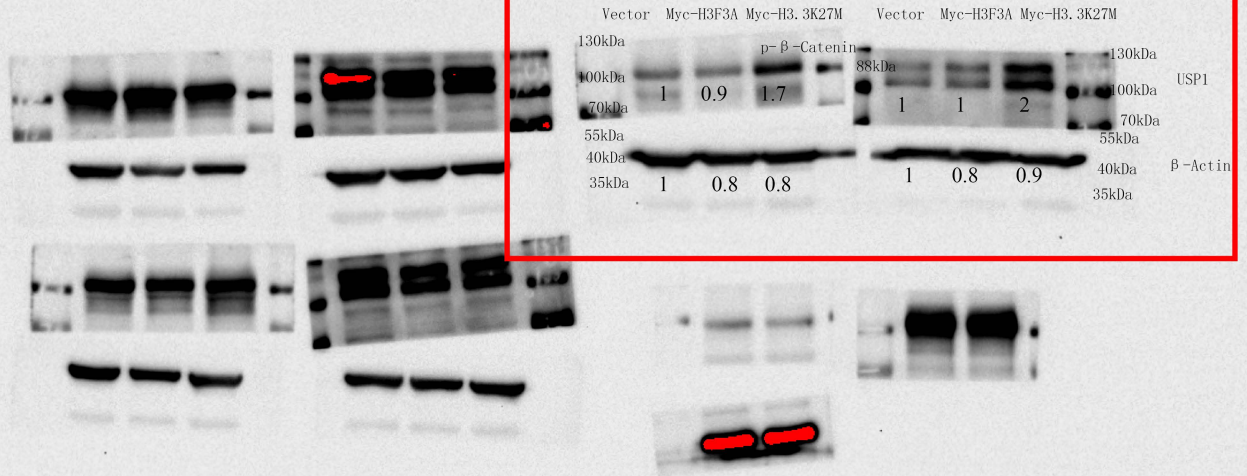



fig5A U87

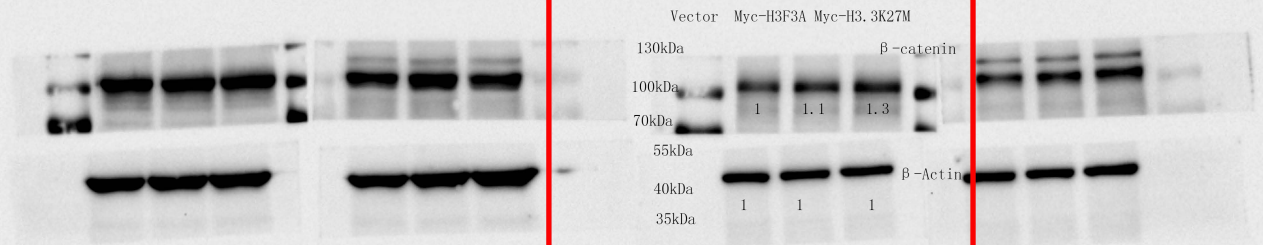

fig5A,D LN229

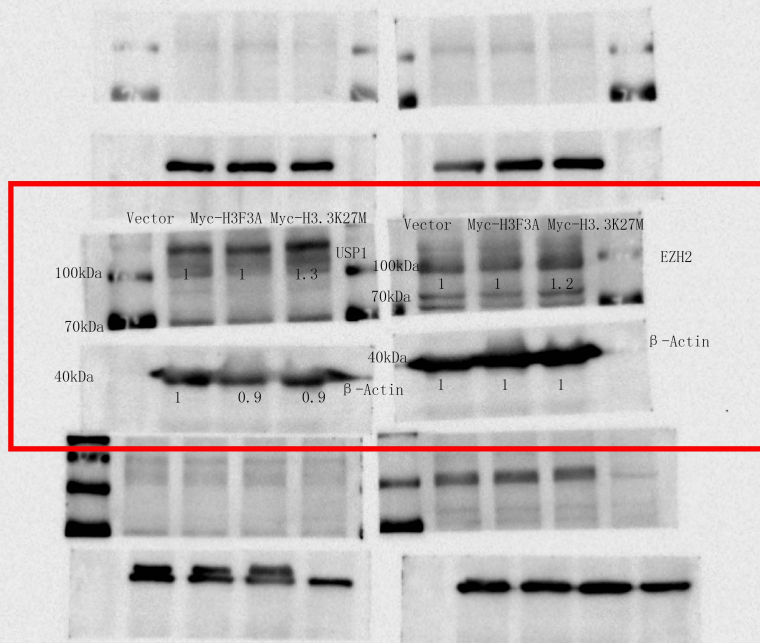

fig5D LN229

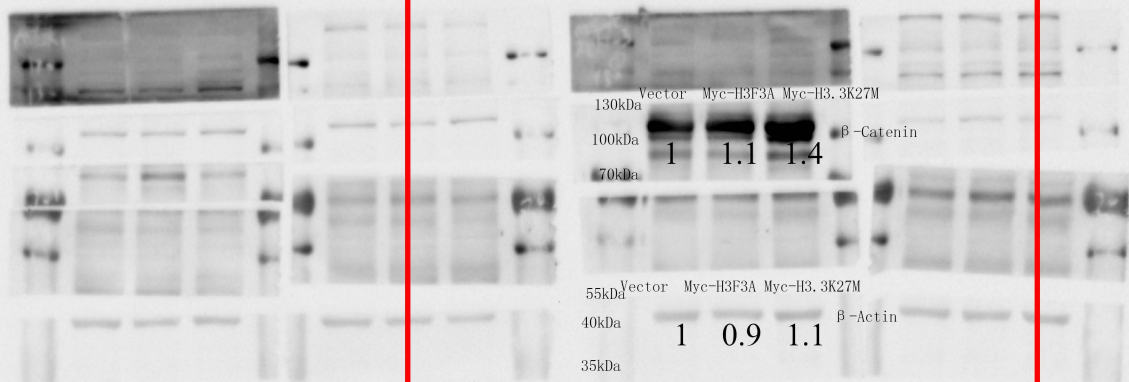



fig5D LN229

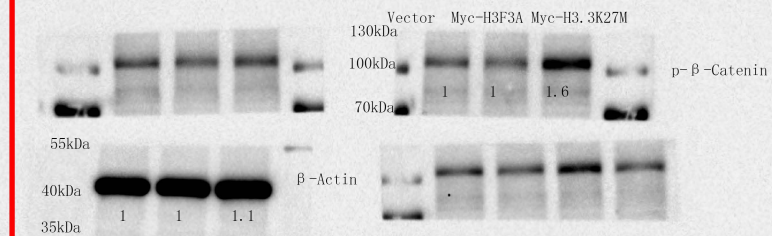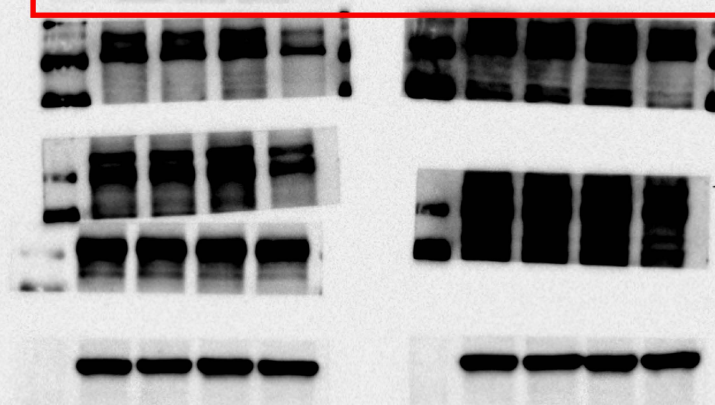



fig5E U87

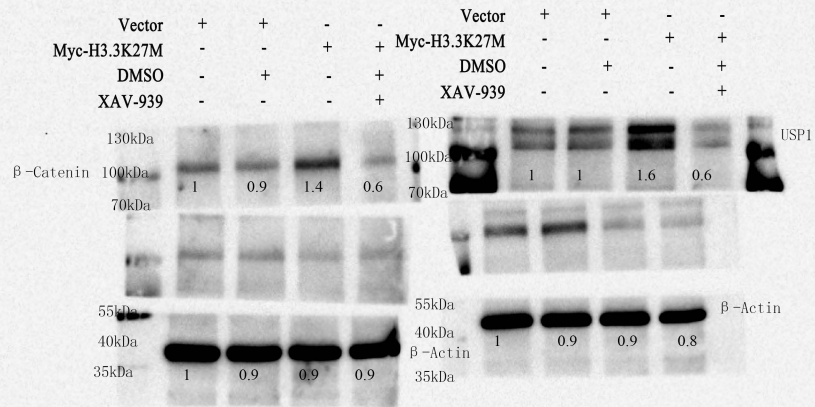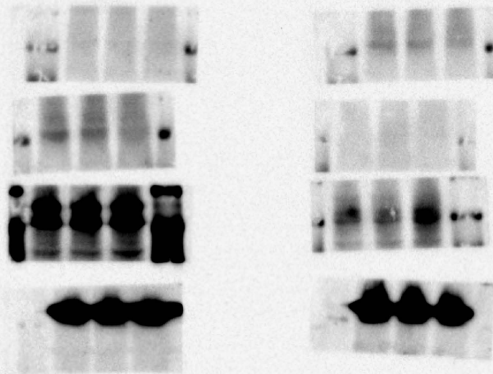

fig5E U87

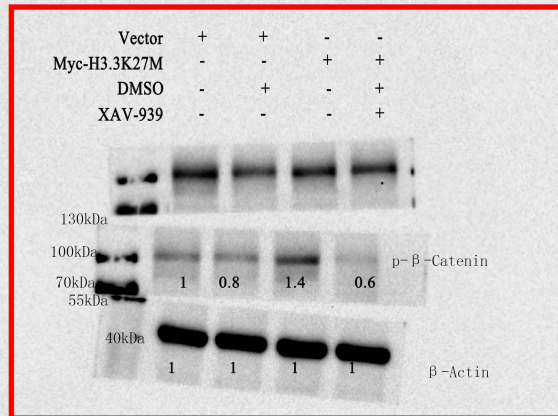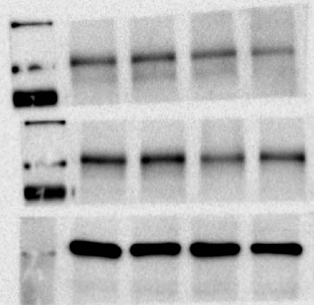



fig5E

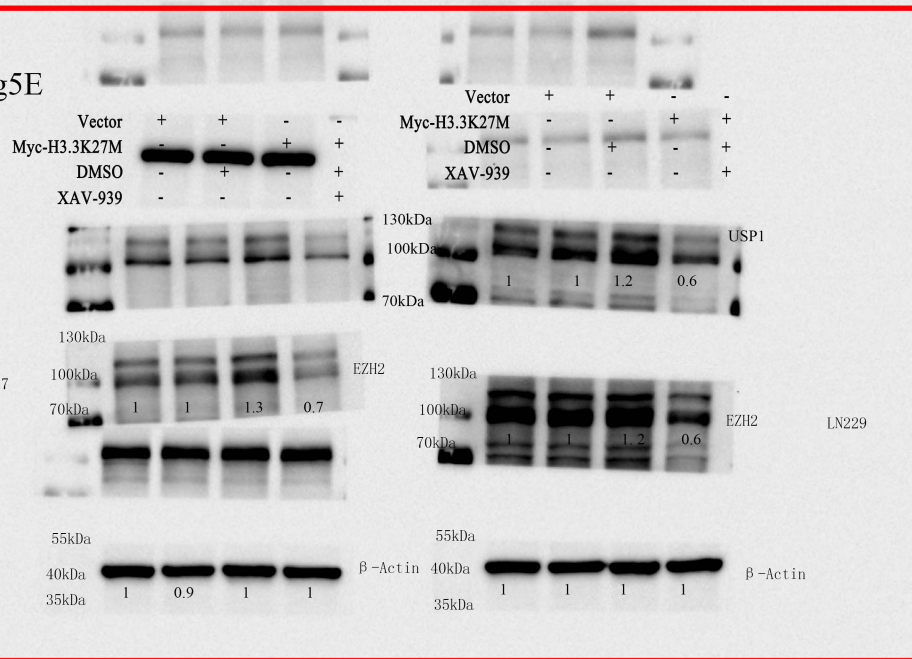

fig5E LN229

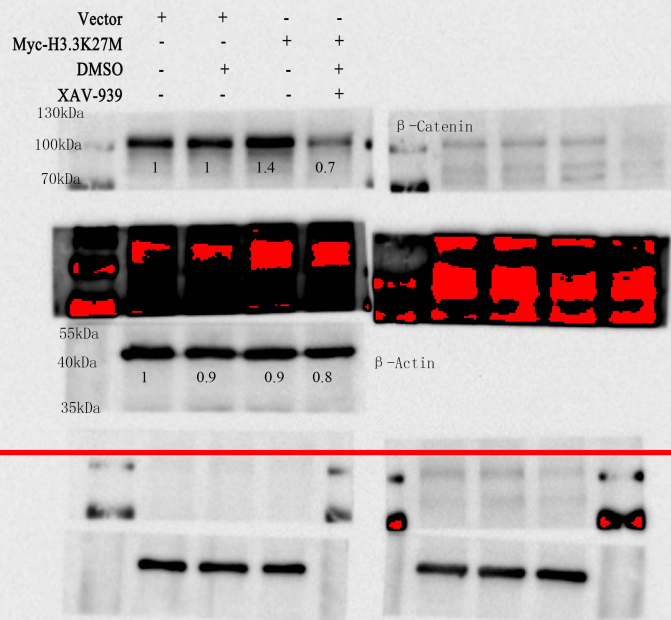



fig5E LN229

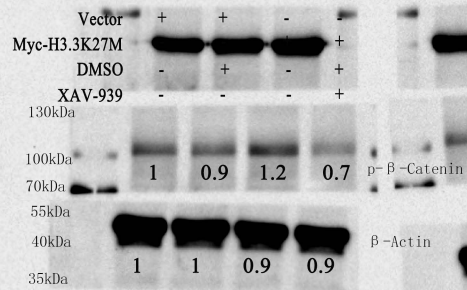

Supplement: s1 [file s1]
