# Supplementary material for: H3F3A K27M Mutation Promotes the Infiltrative Growth of High-Grade Glioma in Adults by Activating β-Catenin/USP1 Signaling
Source: MDPI journal article supplement (doi:10.3390/cancers14194836), 2022-10-03
Supplement: s1 [file s1]

**Table S1.** Patient Demographics.

| Serial number | Grade     | Subtype                      | Location                   | Gender | Age |
|---------------|-----------|------------------------------|----------------------------|--------|-----|
| N1            | Non tumor |                              | Right frontal lobe         | male   | 26  |
| N2            | Non tumor |                              | Left frontal lobe          | male   | 53  |
| N3            | Non tumor |                              | Right temporosphenoid lobe | male   | 55  |
| N4            | Non tumor |                              | Left frontal lobe          | male   | 40  |
| N5            | Non tumor |                              | Right temporosphenoid lobe | female | 65  |
| N6            | Non tumor |                              | Right frontal lobe         | female | 44  |
| T1            | Grade II  | Oligodendroglioma            | Right frontal lobe         | male   | 27  |
| T2            | Grade II  | Oligodendroglioma            | Right frontal lobe         | male   | 41  |
| T3            | Grade II  | Diffuse astrocytoma          | Right frontal lobe         | female | 39  |
| T4            | Grade II  | Oligodendroglioma            | Left frontal lobe          | male   | 31  |
| T5            | Grade II  | Diffuse astrocytoma          | Right temporosphenoid lobe | male   | 43  |
| T6            | Grade II  | Diffuse astrocytoma          | Right frontal lobe         | male   | 38  |
| T7            | Grade II  | Diffuse astrocytoma          | Right temporosphenoid lobe | male   | 40  |
| T8            | Grade III | Anaplastic astrocytoma       | Left frontal lobe          | female | 66  |
| T9            | Grade III | Anaplastic oligodendroglioma | Right temporosphenoid lobe | male   | 48  |
| T10           | Grade III | Anaplastic oligodendroglioma | Left frontal lobe          | female | 59  |
| T11           | Grade III | Anaplastic oligodendroglioma | Right frontal lobe         | male   | 53  |
| T12           | Grade III | Anaplastic oligodendroglioma | Fourth ventricle           | female | 19  |
| T13           | Grade III | Anaplastic oligodendroglioma | Left temporosphenoid lobe  | female | 55  |
| T14           | Grade III | Anaplastic oligodendroglioma | Right temporosphenoid lobe | male   | 76  |
| T15           | Grade IV  | Glioblastoma                 | Right frontal lobe         | female | 37  |
| T16           | Grade IV  | Glioblastoma                 | Brainstem                  | female | 54  |
| T17           | Grade IV  | Glioblastoma                 | Left temporosphenoid lobe  | female | 65  |
| T18           | Grade IV  | Glioblastoma                 | Thalamus                   | male   | 43  |
| T19           | Grade IV  | Glioblastoma                 | Left frontal lobe          | male   | 30  |
| T20           | Grade IV  | Glioblastoma                 | Right frontal lobe         | female | 53  |
| T21           | Grade IV  | Glioblastoma                 | Right temporosphenoid lobe | male   | 73  |
| T22           | Grade IV  | Glioblastoma                 | Right frontal lobe         | female | 57  |
